# Supplementary material for: Diversity and evolution of the repetitive genomic content in Cannabis sativa
Source: PubMed Central journal article supplement (PMC5822635; doi:10.1186/s12864-018-4494-3), 2018-02-21
Supplement: 12864_2018_4494_MOESM1_ESM.pdf [file 12864_2018_4494_MOESM1_ESM.pdf]

## Additional file

# Diversity and Evolution of the Repetitive Content in the Genome of *Cannabis sativa*

Rahul Pisupati<sup>1</sup>, Daniela Vergara<sup>2</sup>, Nolan C. Kane<sup>2§</sup>

**Table S1**

Raw data information and repeat content for different varieties of *Cannabis sativa*, *Humulus lupulus*, *Morus notabilis* and *Arabidopsis thaliana*.

| Species                     | Strain/Cultivar | Approx. Genome Size (Mbp) | SRARun         | Read Length (bp) | Number of reads analysed | MBases analysed | Avg. coverage | Est. Repeat Content |
|-----------------------------|-----------------|---------------------------|----------------|------------------|--------------------------|-----------------|---------------|---------------------|
| <i>Cannabis sativa</i>      | Purple kush     | 830                       | SRR352<br>164  | 100              | 8000000                  | 800             | 0.96          | 64.5                |
| <i>Cannabis sativa</i>      | finola          | 830                       | SRR351<br>929  | 100              | 8000000                  | 800             | 0.96          | 64.5                |
| <i>Cannabis sativa</i>      | USO31           | 830                       | SRR351<br>494  | 100              | 8000000                  | 800             | 0.96          | 65.2                |
| <i>Cannabis sativa</i>      | G13             | 830                       | SRR329<br>4442 | 148              | 2947748                  | 436             | 0.53          | 61.5                |
| <i>Cannabis sativa</i>      | Hawaiian        | 830                       | SRR329<br>4438 | 148              | 4394648                  | 650             | 0.78          | 61.3                |
| <i>Cannabis sativa</i>      | Carmagnola      | 830                       | SRR329<br>4431 | 148              | 17595110                 | 2,604           | 3.14          | 59.7                |
| <i>Cannabis sativa</i>      | Tangerine haze  | 830                       | SRR329<br>4475 | 148              | 21154734                 | 3,131           | 3.77          | 60.1                |
| <i>Humulus lupulus</i>      | cordifolius     | 2500                      | DRR024<br>456  | 75               | 70000000                 | 5,250           | 2.10          | 60.1                |
| <i>Humulus lupulus</i>      | cordifolius     | 2500                      | DRR024<br>452  | 75               | 65213792                 | 4,891           | 1.96          | 59.2                |
| <i>Humulus lupulus</i>      | lupulus SW      | 2500                      | DRR024<br>400  | 109              | 50000000                 | 5,450           | 2.18          | 65.3                |
| <i>Humulus lupulus</i>      | lupulus SW      | 2500                      | DRR024<br>410  | 100              | 50000000                 | 5,000           | 2.00          | 61.3                |
| <i>Morus notabilis</i>      |                 | 330                       | SRR847<br>535  | 100              | 6600000                  | 660             | 2.00          | 43.3                |
| <i>Arabidopsis thaliana</i> | Ost-0           | 150                       | SRR519<br>656  | 100              | 2000000                  | 200             | 1.33          | 23.9                |

**Table S2**

Repetitive content (percentage of the genome) in the genomes of *C. sativa* PK, Finola (FIN), USO31 (USO), *H. lupulus* (HUM) and, *M. notabilis* (MOR).

|                           | PK    | FIN   | USO   | HUM   | MOR   |
|---------------------------|-------|-------|-------|-------|-------|
| <b>Total content</b>      | 64.50 | 64.46 | 65.20 | 60.10 | 43.30 |
| <b>ARTEFACT</b>           | 0.17  | 0.00  | 0.10  | 0.00  | 0.00  |
| <b>DNA</b>                | 0.02  | 0.00  | 0.03  | 0.00  | 0.00  |
| <b>DNA/CMC-EnSpm</b>      | 1.39  | 1.05  | 1.33  | 0.98  | 1.21  |
| <b>DNA/hAT</b>            | 0.00  | 0.00  | 0.00  | 0.00  | 0.00  |
| <b>DNA/hAT-Ac</b>         | 0.02  | 0.01  | 0.01  | 0.03  | 1.13  |
| <b>DNA/hAT-Tag1</b>       | 0.00  | 0.00  | 0.00  | 0.00  | 0.00  |
| <b>DNA/hAT-Tip100</b>     | 0.00  | 0.00  | 0.00  | 0.00  | 0.09  |
| <b>DNA/MULE-MuDR</b>      | 0.81  | 1.01  | 0.79  | 0.37  | 3.35  |
| <b>DNA/PIF-Harbinger</b>  | 0.00  | 0.01  | 0.00  | 0.01  | 0.25  |
| <b>DNA/TcMar-Stowaway</b> | 0.00  | 0.00  | 0.00  | 0.00  | 0.14  |
| <b>LINE/L1</b>            | 0.15  | 0.13  | 0.03  | 0.11  | 0.13  |
| <b>LINE/RTE-BovB</b>      | 0.00  | 0.00  | 0.00  | 0.00  | 0.18  |
| <b>Low complexity</b>     | 2.87  | 1.06  | 3.28  | 0.89  | 1.40  |
| <b>LTR</b>                | 0.65  | 0.44  | 0.54  | 0.10  | 0.00  |
| <b>LTR/Caulimovirus</b>   | 0.00  | 0.00  | 0.00  | 0.04  | 0.27  |
| <b>LTR/Copia</b>          | 14.10 | 15.14 | 12.53 | 8.53  | 9.80  |
| <b>LTR/Gypsy</b>          | 15.44 | 14.85 | 13.96 | 19.24 | 7.57  |
| <b>RC/Helitron</b>        | 0.02  | 0.00  | 0.00  | 0.00  | 0.14  |
| <b>rDNA</b>               | 2.25  | 2.57  | 1.73  | 0.10  | 0.89  |
| <b>Satellite</b>          | 0.08  | 0.09  | 0.18  | 0.12  | 0.00  |
| <b>Satellite/centr</b>    | 0.00  | 0.00  | 0.00  | 0.00  | 0.00  |
| <b>Simple repeat</b>      | 25.88 | 27.75 | 26.63 | 29.18 | 13.04 |
| <b>Unknown</b>            | 0.64  | 0.36  | 4.06  | 0.00  | 3.72  |

**Table S3**

Repeat sequence conservation, as measured by percent sequence similarity among consensus sequences from each repeat class in each genotype, compared to the consensus

repeats from the *C. sativa* PK genome. The missing entries are due to the absence of specific families in either of the genomes' repeat libraries.

|                                   | MOR   | HUM   | FIN   | USO   |
|-----------------------------------|-------|-------|-------|-------|
| <b>Average percent similarity</b> | 16.50 | 24.67 | 71.71 | 53.19 |
| <b>ARTEFACT</b>                   | -     | -     | -     | 11.38 |
| <b>DNA/CMC-EnSpm</b>              | 14.30 | 57.21 | 73.87 | 53.18 |
| <b>DNA/hAT-Ac</b>                 | -     | -     | 97.07 | -     |
| <b>DNA/MULE-MuDR</b>              | 6.52  | 18.05 | 73.31 | 56.41 |
| <b>LINE</b>                       | -     |       | 35.73 | -     |
| <b>Low complexity</b>             | 0.00  | -     | 19.24 | 19.75 |
| <b>LTR</b>                        | -     | -     | 19.48 | 22.81 |
| <b>LTR/Copia</b>                  | 8.75  | 18.05 | 76.37 | 51.14 |
| <b>LTR/Gypsy</b>                  | 13.05 | 19.04 | 68.10 | 49.50 |
| <b>rDNA</b>                       | 68.25 | -     | 97.06 | 81.35 |
| <b>Simple repeat</b>              | 13.62 | 8.82  | 75.74 | 42.64 |
